# Supplementary material for: Architecture of the CdIn2S4/graphene nano-heterostructure for solar hydrogen production and anode for lithium ion battery
Source: Royal Society of Chemistry journal article supplement (doi:10.1039/c6ra02002j), 2016-01-01
Supplement: c6ra02002j1.pdf [file c6ra02002j1.pdf]

## Supporting Information

### Architecture of CdIn<sub>2</sub>S<sub>4</sub>/graphene nano-heterostructure for Solar Hydrogen Production and Anode for Lithium Ion Battery.

Manjiri A. Mahadadalkar<sup>†a</sup>, Sayali B. Kale<sup>†b</sup>, Ramchandra S. Kalubarme<sup>†cd</sup>, Ashwini P. Bhirud<sup>a</sup>, Jalindar D. Ambekar<sup>a</sup>, Suresh W. Gosavi<sup>d</sup>, Milind V. Kulkarni<sup>a</sup>, Chan-Jin Park<sup>\*c</sup>, Bharat B. Kale<sup>\*ac</sup>

<sup>a</sup>Centre for Materials for Electronic Technology, Panchawati, Off Pashan Road, Pune 411008, India.

E-mail: \*kbbb1@yahoo.com

<sup>b</sup>Mechanical Engineering Department, College of Engineering (MES), Wadia College Campus, Pune -411000, India.

<sup>c</sup>Department of Materials Science and Engineering, Chonnam National University 77, Yongbongro, Bukgu, Gwangju, Korea.

E-mail: \* parkcj@jnu.ac.kr

<sup>d</sup>Department of Physics, Savitribai Phule Pune University, Ganeshkhind, Pune 411016, India.

#### Supporting S1

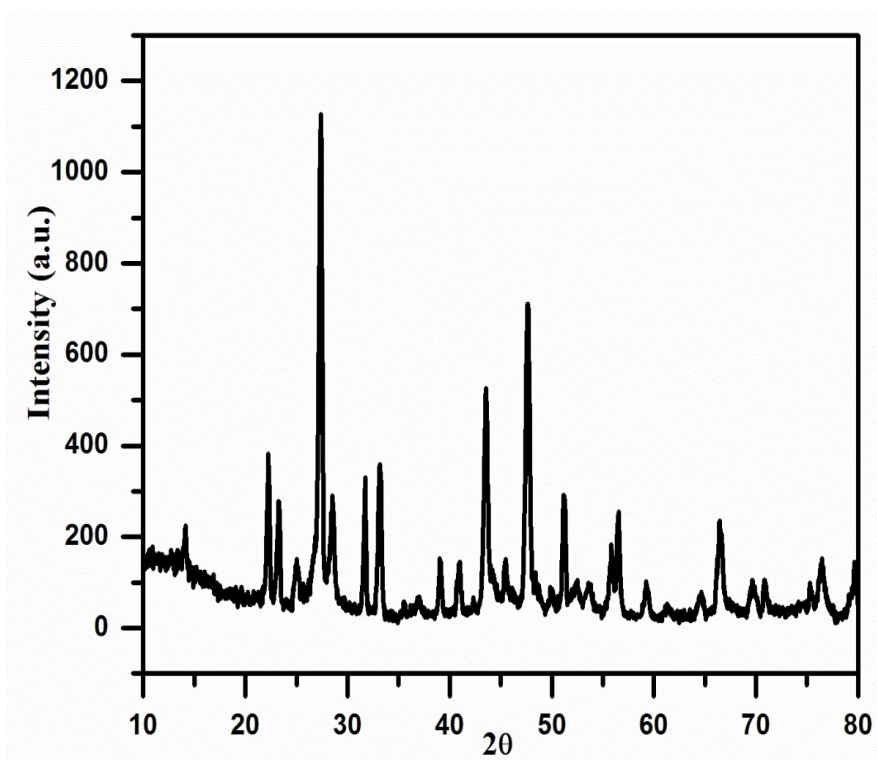

Fig. S1 XRD spectrum of sample C7.



Supporting S4

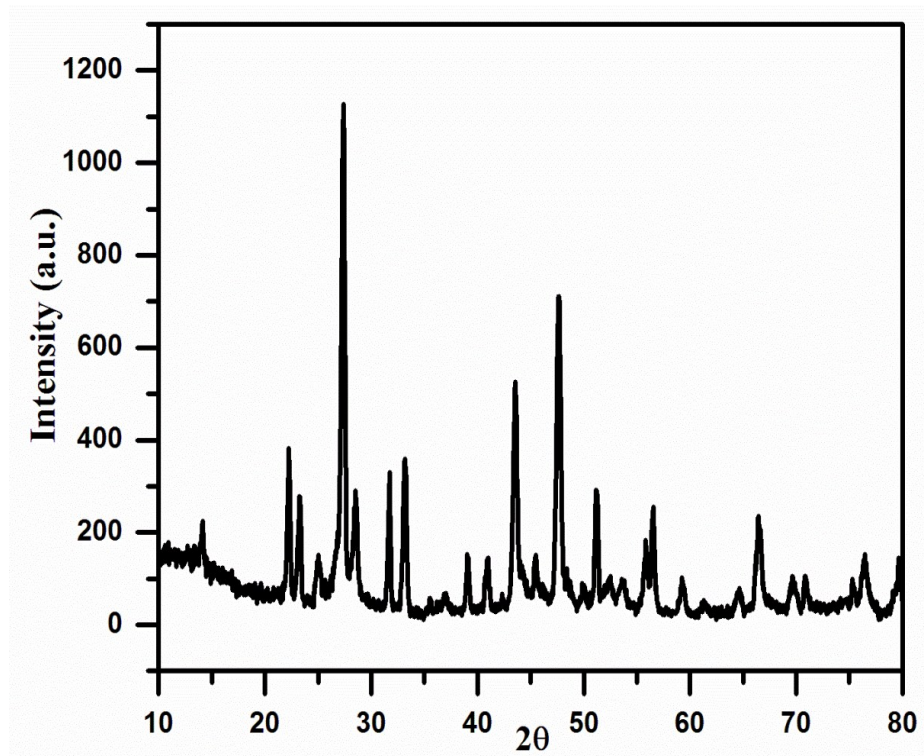

Fig. S4 XRD spectrum of samples C4 after five cycles of photocatalytic study (H<sub>2</sub>S Splitting).

Supporting S5

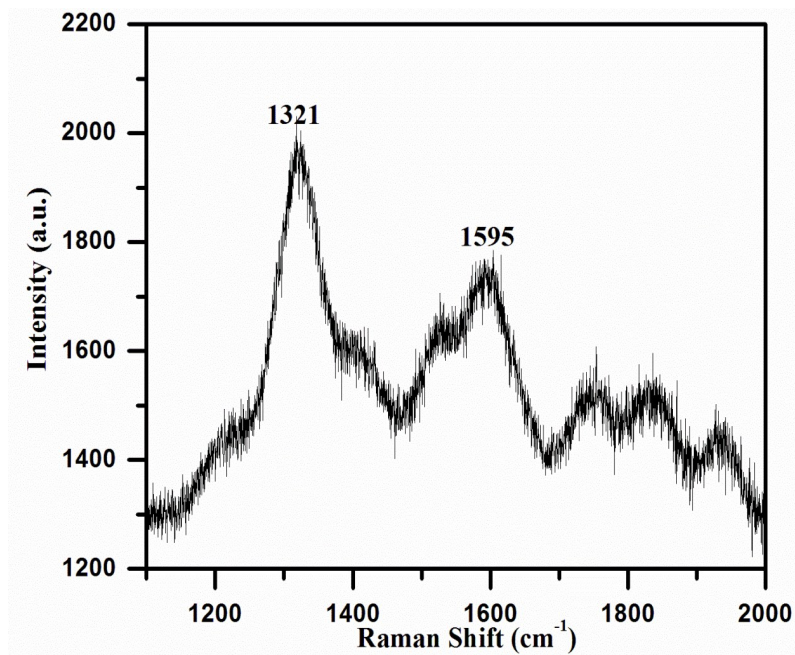

Fig. S5. Raman spectrum of sample C4 after five cycles of photocatalytic study (H<sub>2</sub>S Splitting).

Supporting S6

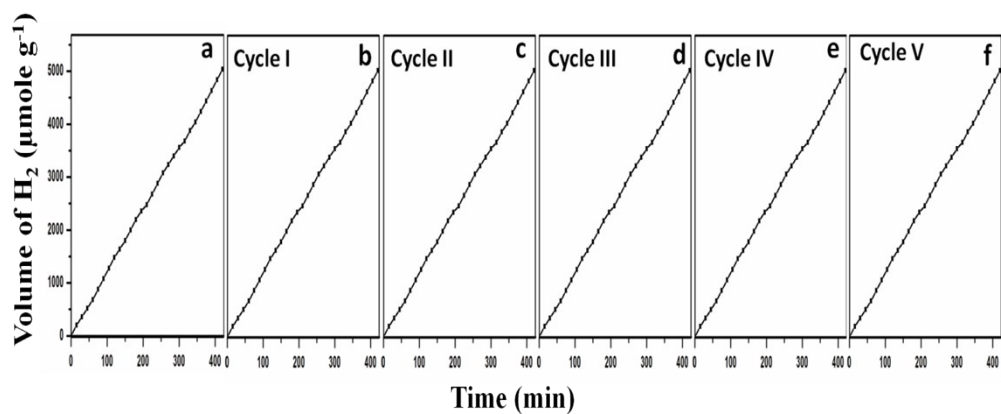

Fig. S6. Time versus volume of H<sub>2</sub> (μmole/g) evolution from water of sample C4 (a) fresh sample and (b-f) after five cycles of reuse of the same sample.

Supporting S7

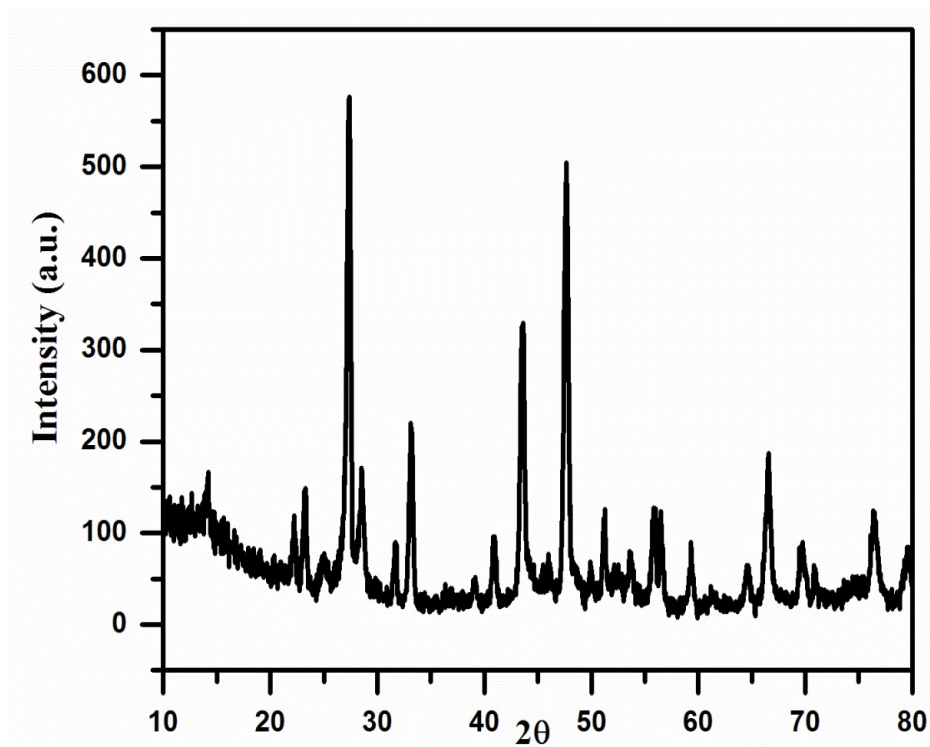

Fig. S7. XRD spectrum of samples C4 after five cycles of photocatalytic study (H<sub>2</sub>O Splitting).

Supporting S8

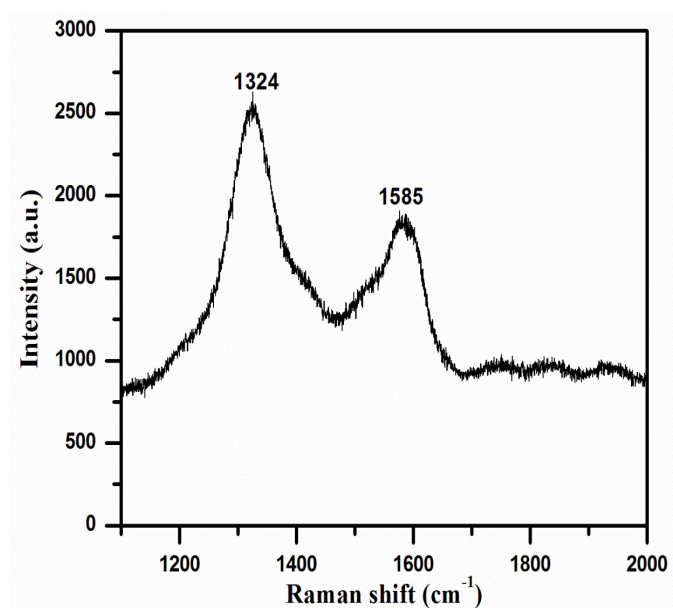

Fig. S8 Raman spectrum of sample C4 after five cycles of photocatalytic study (H<sub>2</sub>O Splitting).

Supporting S9

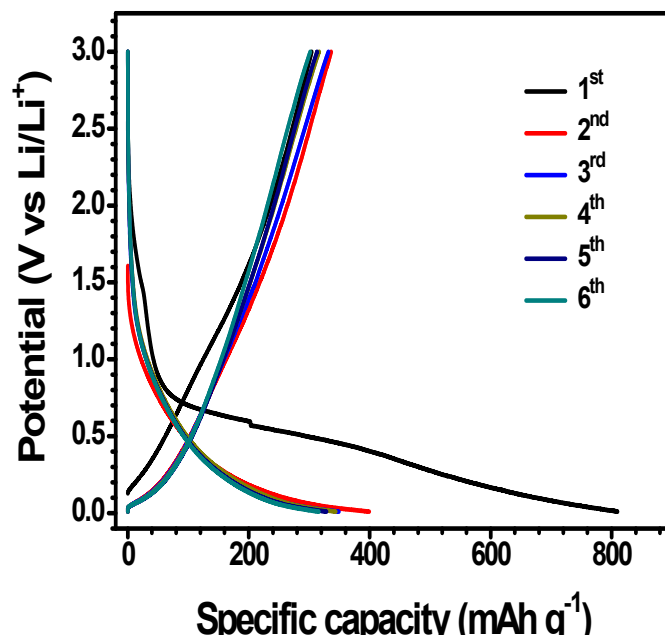

Fig. S9 Charge-discharge profile of pure graphene.

**Table S1.** Quantum yield of Bare CdIn<sub>2</sub>S<sub>4</sub> is 3.34% and that of Sample C4 is 6.33%.

| Photocatalyst                                                          | Amount (g) | Light Source     | Apparent Quantum yield % | H <sub>2</sub> evolution rate (μmole h <sup>-1</sup> ) | Reference     |
|------------------------------------------------------------------------|------------|------------------|--------------------------|--------------------------------------------------------|---------------|
| Bare CdIn <sub>2</sub> S <sub>4</sub> (C1)                             | 0.2        | 300 W Xenon lamp | 3.34                     | 2375                                                   | Present* Work |
| CdIn <sub>2</sub> S <sub>4</sub> /graphene composite (C4)              | 0.2        | 300 W Xenon lamp | 6.33                     | 4495                                                   | Present Work* |
| CdIn <sub>2</sub> S <sub>4</sub> (marigold-flower like morphology)     | 1          | 450 W Xenon lamp | 16.8                     | 3476                                                   | 1             |
| CdIn <sub>2</sub> S <sub>4</sub> (nanotubes)                           | 1          | 450 W Xenon lamp | 17.1                     | 3480                                                   | 1             |
| CdIn <sub>2</sub> S <sub>4</sub> (compact flowers)                     | 0.5        | 300 W Xenon lamp | -                        | 1007                                                   | 2             |
| CdIn <sub>2</sub> S <sub>4</sub> (puffy flowers)                       | 0.5        | 300 W Xenon lamp | -                        | 2320                                                   | 2             |
| CdIn <sub>2</sub> S <sub>4</sub> (Marigold flower with hollow cavity)  | 0.5        | 300 W Xenon lamp | -                        | 3171                                                   | 2             |
| CdIn <sub>2</sub> S <sub>4</sub> (Bipyramids grown on Marigold flower) | 0.5        | 300 W Xenon lamp | -                        | 3238                                                   | 2             |

\*Just with 0.2gms gives good AQE just for low intensity Lamp as compared to our earlier AFM report where 1gm sample was considered and lamp was 450 watt ( more no of photons).

**Table S2.** Comparison of the electrochemical performance of Metal sulphides with CdIn<sub>2</sub>S<sub>4</sub> and CdIn<sub>2</sub>S<sub>4</sub>/graphene.

| Sr. No | Composition                                | Specific capacity 1 <sup>st</sup> discharge/ charge (mAh g <sup>-1</sup> ) | Capacity retention                   | Reference |
|--------|--------------------------------------------|----------------------------------------------------------------------------|--------------------------------------|-----------|
| 1      | CdIn <sub>2</sub> S <sub>4</sub>           | 842 / 602                                                                  | 613 mAh g <sup>-1</sup> (125 cycles) | This work |
| 2      | CdIn <sub>2</sub> S <sub>4</sub> /graphene | 1091 / 678                                                                 | 532 mAh g <sup>-1</sup> (125 cycles) | This work |
| 3      | In <sub>2</sub> S <sub>3</sub> /graphene   | 1820 / 1056                                                                | 522 mAh g <sup>-1</sup> (100 cycles) | 3         |
| 4      | In <sub>2</sub> S <sub>3</sub> Particles   | 1312 / 705                                                                 | 190 mAh g <sup>-1</sup> (100 cycles) | 4         |
| 5      | In <sub>2</sub> S <sub>3</sub> nanosheet   | 1927 / 828                                                                 | 450 mAh g <sup>-1</sup> (40 cycles)  | 5         |
| 6      | RGO-In <sub>2</sub> S <sub>3</sub>         | 1327 / 867                                                                 | 604 mAh g <sup>-1</sup> (200 cycles) | 6         |
| 7      | ZnS/C                                      | 1021 / 482                                                                 | 304 mAh g <sup>-1</sup> (300 cycles) | 7         |
| 8      | ZnS                                        | 914 / 598                                                                  | 204 mAh g <sup>-1</sup> (200 cycles) | 8         |
| 9      | CuS/ Graphene                              | 827 / 484                                                                  | 296 mAh g <sup>-1</sup> (25 cycles)  | 9         |
| 10     | CuS                                        | 547 / 514                                                                  | 472 mAh g <sup>-1</sup> (100 cycles) | 10        |

## References:

- 1 B. B. Kale, J. O. Baeg, S. M. Lee, H. Chang, S. J. Moon and C. W. Lee, Adv. Funct. Mater., 2006, **16**, 1349-1354.
- 2 A. P. Bhirud, N. S. Chaudhari, L. Nikam, R. S. Sonawane, K. S. Patil, J. O. Baeg and B. B. Kale, Int. J. Hydrogen Energy., 2011, **36**, 11628-11639.
- 3 Y. Gu and Y. Wang, RSC Adv. 2014, **4**, 8582–8589.
- 4 X. Yang, C. Y. Chan, H. T. Xue, J. Xu, Y.-B. Tang, Q. Wang, T. L. Wong and C.-S. Lee, CrystEngComm, 2013, **15**, 6578–6584.
- 5 F. Ye, C. Wang, G. Du, X. Chen, Y. Zhong and J. Z. Jiang, J. Mater. Chem., 2011, **21**, 17063–17065.
- 6 F. Ye, G. Du, Z. Jiang, Y. Zhong, X. Wang, Q. Cao and J. Z. Jiang, Nanoscale, 2012, **4**, 7354–7357.
- 7 L. He, X.-Z. Liao, K. Yang, Y.-S. He, W. Wen and Z.-F. Ma, Electrochimica Acta, 2011, **56**, 1213–1218.
- 8 M. Mao, L. Jiang, L. Wu, M. Zhang and T. Wang, J. Mater. Chem. A, 2015, **3**, 13384-13389.
- 9 H.-C. Tao, X.-L. Yang, L.-L. Zhang and S.-B. Ni, J. Phys. Chem. Solids 2014, **75**, 1205–1209.
- 10 X. Li, X. He, C. Shi, B. Liu, Y. Zhang, S. Wu, Z. Zhu and J. Zhao, ChemSusChem, 2014, **7**, 3328-3333.
